# Supplementary material
Source: MDPI journal article supplement (https://www.mdpi.com/2071-1050/14/7/4174)
Supplement: s1 [file s1]

## Supplementary information for

# A multi-dimensional investigation on water quality of urban rivers with emphasis on implications for the optimization of monitoring strategy

Xiaonan Ji <sup>1,2,3,\*</sup>, Jianghai Chen <sup>1,4</sup> and Yali Guo <sup>1,2,4,\*</sup>

<sup>1</sup> Shanghai Investigation, Design & Research Institute Co., Ltd., Shanghai 200335, China; cjh@sidri.com (J.C.)

<sup>2</sup> YANGTZE Eco-Environment Engineering Research Center (Shanghai), China Three Gorges Corporation, Shanghai 200335, China

<sup>3</sup> Department of Environmental Engineering, College of Environmental Science and Engineering, Tongji University, Shanghai 200092, China

<sup>4</sup> Three Gorges Smart Water Technology Co., Ltd., Shanghai 200335, China

\* Correspondence: jixiaonan14@mails.ucas.ac.cn (X.J.); gyl@sidri.com (Y.G.)

Total Pages (including cover): 6

Number of tables: 5

**Table S1.** Water quality assessment results of different sampling sites using five indexes.

| Sampling site | SF   |                    |                   | MPI  | NPI  | WQII |                    |                   | WQI  |                    |                   |
|---------------|------|--------------------|-------------------|------|------|------|--------------------|-------------------|------|--------------------|-------------------|
|               | TP   | NH <sub>3</sub> -N | COD <sub>Cr</sub> |      |      | TP   | NH <sub>3</sub> -N | COD <sub>Cr</sub> | TP   | NH <sub>3</sub> -N | COD <sub>Cr</sub> |
| S1            | 0.30 | 0.12               | 0.47              | 0.30 | 0.39 | 2.9  | 2.1                | 1.9               | 1.88 | 1.09               | 0.93              |
| S2            | 0.13 | 0.12               | 0.37              | 0.21 | 0.30 | 2.3  | 2.1                | 1.7               | 1.25 | 1.10               | 0.73              |
| S3            | 0.10 | 0.00               | 0.50              | 0.20 | 0.38 | 2.1  | 1.0                | 2.0               | 1.13 | 0.00               | 1.00              |
| S4            | 0.10 | 0.14               | 0.33              | 0.19 | 0.27 | 2.1  | 2.2                | 1.7               | 1.13 | 1.15               | 0.67              |
| S5            | 0.10 | 0.04               | 1.03              | 0.39 | 0.78 | 2.1  | 1.4                | 5.1               | 1.13 | 0.41               | 4.10              |
| S6            | 0.10 | 0.02               | 0.33              | 0.15 | 0.26 | 2.1  | 1.2                | 1.7               | 1.13 | 0.24               | 0.67              |
| S7            | 0.10 | 0.04               | 0.47              | 0.20 | 0.36 | 2.1  | 1.4                | 1.9               | 1.13 | 0.37               | 0.93              |
| S8            | 0.20 | 0.24               | 0.47              | 0.30 | 0.39 | 2.5  | 2.6                | 1.9               | 1.50 | 1.60               | 0.93              |
| S9            | 0.30 | 0.26               | 0.33              | 0.30 | 0.32 | 2.9  | 2.7                | 1.7               | 1.88 | 1.70               | 0.67              |
| S10           | 0.37 | 0.09               | 0.37              | 0.27 | 0.32 | 3.1  | 1.9                | 1.7               | 2.10 | 0.91               | 0.73              |
| S11           | 0.23 | 0.43               | 0.37              | 0.34 | 0.39 | 2.6  | 3.3                | 1.7               | 1.63 | 2.29               | 0.73              |
| S12           | 0.30 | 0.44               | 0.40              | 0.38 | 0.41 | 2.9  | 3.3                | 1.8               | 1.88 | 2.33               | 0.80              |
| S13           | 0.30 | 0.20               | 0.43              | 0.31 | 0.38 | 2.9  | 2.7                | 1.9               | 1.88 | 1.73               | 0.87              |
| S14           | 0.30 | 0.39               | 0.40              | 0.36 | 0.38 | 2.9  | 3.6                | 1.8               | 1.88 | 2.57               | 0.80              |
| S15           | 0.30 | 0.34               | 0.43              | 0.36 | 0.40 | 2.9  | 3.3                | 1.9               | 1.88 | 2.35               | 0.87              |
| S16           | 0.37 | 0.52               | 0.37              | 0.42 | 0.47 | 3.1  | 4.1                | 1.7               | 2.10 | 3.06               | 0.73              |
| S17           | 0.27 | 0.77               | 0.47              | 0.50 | 0.65 | 2.8  | 5.1                | 1.9               | 1.75 | 4.08               | 0.93              |
| S18           | 0.77 | 1.44               | 0.47              | 0.89 | 1.20 | 4.3  | 6.4                | 1.9               | 3.30 | 5.29               | 0.93              |
| S19           | 0.90 | 1.74               | 0.60              | 1.08 | 1.45 | 4.7  | 6.7                | 3.6               | 3.70 | 5.35               | 2.90              |
| S20           | 1.30 | 0.14               | 0.63              | 0.69 | 1.04 | 5.9  | 2.4                | 3.8               | 4.90 | 1.39               | 2.95              |
| S21           | 0.93 | 0.67               | 0.53              | 0.71 | 0.83 | 4.8  | 4.7                | 3.2               | 3.80 | 3.68               | 2.80              |
| S22           | 1.30 | 0.03               | 0.57              | 0.63 | 1.02 | 5.9  | 1.4                | 3.4               | 4.90 | 0.40               | 2.85              |

|            |      |      |      |      |      |     |     |     |      |      |      |
|------------|------|------|------|------|------|-----|-----|-----|------|------|------|
| <b>S23</b> | 1.73 | 0.07 | 0.53 | 0.78 | 1.34 | 6.3 | 1.9 | 3.2 | 5.26 | 0.92 | 2.80 |
| <b>S24</b> | 2.17 | 0.63 | 0.47 | 1.09 | 1.71 | 6.6 | 4.5 | 1.9 | 5.28 | 3.50 | 0.93 |
| <b>S25</b> | 2.70 | 0.37 | 0.47 | 1.18 | 2.08 | 7.0 | 3.5 | 1.9 | 5.29 | 2.46 | 0.93 |
| <b>S26</b> | 1.40 | 0.50 | 0.53 | 0.81 | 1.14 | 6.1 | 4.0 | 3.2 | 5.25 | 2.99 | 2.80 |
| <b>L1</b>  | 0.27 | 0.12 | 0.47 | 0.28 | 0.39 | 2.8 | 2.1 | 1.9 | 1.75 | 1.07 | 0.93 |
| <b>L2</b>  | 0.30 | 0.11 | 0.53 | 0.31 | 0.44 | 2.9 | 2.0 | 3.2 | 1.88 | 1.04 | 2.80 |
| <b>L3</b>  | 0.30 | 0.08 | 0.37 | 0.25 | 0.31 | 2.9 | 1.8 | 1.7 | 1.88 | 0.83 | 0.73 |
| <b>L4</b>  | 0.80 | 1.01 | 0.67 | 0.83 | 0.92 | 4.4 | 5.0 | 4.0 | 3.40 | 4.04 | 3.00 |
| <b>L5</b>  | 0.73 | 0.97 | 0.50 | 0.74 | 0.86 | 4.2 | 4.9 | 2.0 | 3.20 | 3.92 | 1.00 |
| <b>L6</b>  | 0.77 | 1.10 | 0.53 | 0.80 | 0.96 | 4.3 | 5.3 | 3.2 | 3.30 | 4.30 | 2.80 |
| <b>L7</b>  | 1.03 | 1.94 | 0.23 | 1.07 | 1.57 | 5.1 | 6.5 | 1.5 | 4.10 | 5.39 | 0.47 |
| <b>L8</b>  | 0.87 | 2.07 | 0.57 | 1.17 | 1.68 | 4.6 | 6.6 | 3.4 | 3.60 | 5.41 | 2.85 |
| <b>L9</b>  | 0.47 | 1.46 | 0.53 | 0.82 | 1.18 | 3.4 | 6.5 | 3.2 | 2.40 | 5.39 | 2.80 |
| <b>L10</b> | 0.80 | 0.04 | 0.60 | 0.48 | 0.66 | 4.4 | 1.6 | 3.6 | 3.40 | 0.59 | 2.90 |
| <b>L11</b> | 0.87 | 1.41 | 0.57 | 0.95 | 1.20 | 4.6 | 6.4 | 3.4 | 3.60 | 5.28 | 2.85 |
| <b>L12</b> | 1.00 | 1.84 | 0.53 | 1.12 | 1.52 | 5.0 | 6.8 | 3.2 | 4.00 | 5.37 | 2.80 |
| <b>L13</b> | 1.53 | 1.74 | 0.63 | 1.30 | 1.54 | 6.2 | 6.7 | 3.8 | 5.26 | 5.35 | 2.95 |
| <b>L14</b> | 1.03 | 1.86 | 0.60 | 1.16 | 1.55 | 5.1 | 6.9 | 3.6 | 4.10 | 5.37 | 2.90 |
| <b>L15</b> | 1.10 | 1.85 | 0.50 | 1.15 | 1.54 | 5.3 | 6.9 | 2.0 | 4.30 | 5.37 | 1.00 |
| <b>L16</b> | 1.13 | 1.84 | 0.50 | 1.16 | 1.54 | 5.4 | 6.8 | 2.0 | 4.40 | 5.37 | 1.00 |
| <b>L17</b> | 1.13 | 1.75 | 0.53 | 1.14 | 1.48 | 5.4 | 6.8 | 3.2 | 4.40 | 5.35 | 2.80 |
| <b>L18</b> | 1.07 | 1.18 | 0.47 | 0.90 | 1.05 | 5.2 | 6.2 | 1.9 | 4.20 | 5.24 | 0.93 |

---

**Table S2.** Judgement matrix of 11 water quality assessment indexes.

|                              | SF-TP | SF-NH <sub>3</sub> | SF-COD <sub>Cr</sub> | MPI   | NPI   | WQII-TP | WQII-NH <sub>3</sub> | WQII-COD <sub>Cr</sub> | WQLI-TP | WQLI-NH <sub>3</sub> | WQLI-COD <sub>Cr</sub> |
|------------------------------|-------|--------------------|----------------------|-------|-------|---------|----------------------|------------------------|---------|----------------------|------------------------|
| <b>SF-TP</b>                 | 1.000 | 0.143              | 6.000                | 0.200 | 0.333 | 0.222   | 0.182                | 0.500                  | 0.222   | 0.167                | 0.500                  |
| <b>SF-NH<sub>3</sub></b>     | 7.000 | 1.000              | 9.000                | 3.000 | 5.000 | 4.000   | 2.000                | 6.000                  | 4.000   | 2.000                | 6.000                  |
| <b>SF-COD<sub>Cr</sub></b>   | 0.167 | 0.111              | 1.000                | 0.127 | 0.143 | 0.133   | 0.125                | 0.148                  | 0.133   | 0.118                | 0.148                  |
| <b>MPI</b>                   | 5.000 | 0.333              | 7.875                | 1.000 | 2.000 | 3.000   | 0.500                | 4.000                  | 3.000   | 0.333                | 4.000                  |
| <b>NPI</b>                   | 3.000 | 0.200              | 7.000                | 0.500 | 1.000 | 0.667   | 0.296                | 2.000                  | 0.667   | 0.250                | 2.000                  |
| <b>WQII-TP</b>               | 4.500 | 0.250              | 7.500                | 0.333 | 1.500 | 1.000   | 0.500                | 3.000                  | 1.000   | 0.333                | 3.000                  |
| <b>WQII-NH<sub>3</sub></b>   | 5.500 | 0.500              | 8.000                | 2.000 | 3.375 | 2.000   | 1.000                | 4.000                  | 2.000   | 0.500                | 4.000                  |
| <b>WQII-COD<sub>Cr</sub></b> | 2.000 | 0.167              | 6.750                | 0.250 | 0.500 | 0.333   | 0.250                | 1.000                  | 0.333   | 0.200                | 1.000                  |
| <b>WQLI-TP</b>               | 4.500 | 0.250              | 7.500                | 0.333 | 1.500 | 1.000   | 0.500                | 3.000                  | 1.000   | 0.333                | 3.000                  |
| <b>WQLI-NH<sub>3</sub></b>   | 6.000 | 0.500              | 8.500                | 2.500 | 4.000 | 3.000   | 2.000                | 5.000                  | 3.000   | 1.000                | 5.000                  |
| <b>WQLI-COD<sub>Cr</sub></b> | 2.000 | 0.167              | 6.750                | 0.250 | 0.500 | 0.333   | 0.250                | 1.000                  | 0.333   | 0.200                | 1.000                  |

**Table S3.** Weight of 11 water quality assessment indexes.

| SF-TP  | SF-NH <sub>3</sub> | SF-COD <sub>Cr</sub> | MPI    | NPI    | WQII-TP | WQII-NH <sub>3</sub> | WQII-COD <sub>Cr</sub> | WQLI-TP | WQLI-NH <sub>3</sub> | WQLI-COD <sub>Cr</sub> |
|--------|--------------------|----------------------|--------|--------|---------|----------------------|------------------------|---------|----------------------|------------------------|
| 0.0254 | 0.2429             | 0.0116               | 0.1197 | 0.0558 | 0.0754  | 0.1368               | 0.0360                 | 0.0754  | 0.1851               | 0.0360                 |

**Table S4.** Range with the permissible values of three parameters at 44 sampling sites along the two rivers during the sampling campaign on December, 2020.

| Sampling site | Range with permissible values (%) |       |                   | Sampling site | Range with permissible values (%) |       |                   |
|---------------|-----------------------------------|-------|-------------------|---------------|-----------------------------------|-------|-------------------|
|               | NH <sub>3</sub> -N                | TP    | COD <sub>Cr</sub> |               | NH <sub>3</sub> -N                | TP    | COD <sub>Cr</sub> |
| S1            | 30.0                              | 12.1  | 46.7              | L1            | 26.7                              | 11.7  | 46.7              |
| S2            | 13.3                              | 12.4  | 36.7              | L2            | 30.0                              | 10.9  | 53.3              |
| S3            | 10.0                              | 0.0   | 50.0              | L3            | 30.0                              | 8.3   | 36.7              |
| S4            | 10.0                              | 13.6  | 33.3              | L4            | 80.0                              | 101.3 | 66.7              |
| S5            | 10.0                              | 4.1   | 103.3             | L5            | 73.3                              | 97.3  | 50.0              |
| S6            | 10.0                              | 2.4   | 33.3              | L6            | 76.7                              | 110.0 | 53.3              |
| S7            | 10.0                              | 3.7   | 46.7              | L7            | 103.3                             | 194.0 | 23.3              |
| S8            | 20.0                              | 24.0  | 46.7              | L8            | 86.7                              | 206.7 | 56.7              |
| S9            | 30.0                              | 26.3  | 33.3              | L9            | 46.7                              | 145.5 | 53.3              |
| S10           | 36.7                              | 9.1   | 36.7              | L10           | 80.0                              | 4.5   | 60.0              |
| S11           | 23.3                              | 43.1  | 36.7              | L11           | 86.7                              | 140.5 | 56.7              |
| S12           | 30.0                              | 44.3  | 40.0              | L12           | 100.0                             | 184.0 | 53.3              |
| S13           | 30.0                              | 20.3  | 43.3              | L13           | 153.3                             | 174.0 | 63.3              |
| S14           | 30.0                              | 39.3  | 40.0              | L14           | 103.3                             | 186.0 | 60.0              |
| S15           | 30.0                              | 33.7  | 43.3              | L15           | 110.0                             | 185.0 | 50.0              |
| S16           | 36.7                              | 51.5  | 36.7              | L16           | 113.3                             | 184.0 | 50.0              |
| S17           | 26.7                              | 77.0  | 46.7              | L17           | 113.3                             | 175.0 | 53.3              |
| S18           | 76.7                              | 144.0 | 46.7              | L18           | 106.7                             | 117.5 | 46.7              |
| S19           | 90.0                              | 174.0 | 60.0              |               |                                   |       |                   |
| S20           | 130.0                             | 14.4  | 63.3              |               |                                   |       |                   |
| S21           | 93.3                              | 67.0  | 53.3              |               |                                   |       |                   |
| S22           | 130.0                             | 3.0   | 56.7              |               |                                   |       |                   |
| S23           | 173.3                             | 6.9   | 53.3              |               |                                   |       |                   |
| S24           | 216.7                             | 62.5  | 46.7              |               |                                   |       |                   |
| S25           | 270.0                             | 36.6  | 46.7              |               |                                   |       |                   |
| S26           | 140.0                             | 49.7  | 53.3              |               |                                   |       |                   |

**Table S5.** Range with the permissible values of four parameters at sampling sites S23 and S26 along the Shili river from January, 2020 to March, 2021.

| Date       | Range with permissible values (%) |                    |       |     |                   |                    |       |     |
|------------|-----------------------------------|--------------------|-------|-----|-------------------|--------------------|-------|-----|
|            | S23                               |                    |       |     | S26               |                    |       |     |
|            | COD <sub>Cr</sub>                 | NH <sub>3</sub> -N | TP    | Cu  | COD <sub>Cr</sub> | NH <sub>3</sub> -N | TP    | Cu  |
| 2020.01.15 | 86.7                              | 387.5              | 203.3 | 0.9 | 66.7              | 132.0              | 266.7 | 0.4 |
| 2020.02.18 | 56.7                              | 26.0               | 16.7  | 0.6 | 33.3              | 46.0               | 26.7  | 3.6 |
| 2020.03.10 | 53.3                              | 64.0               | 33.3  | 0.1 | 66.7              | 59.0               | 20.0  | 0.1 |
| 2020.04.14 | 26.7                              | 65.0               | 46.7  | 0.2 | 40.0              | 115.0              | 80.0  | 0.1 |
| 2020.05.12 | 46.7                              | 124.0              | 70.0  | 0.4 | 36.7              | 215.0              | 53.3  | 0.9 |

|                       |       |       |       |     |       |       |       |     |
|-----------------------|-------|-------|-------|-----|-------|-------|-------|-----|
| 2020.06.11            | 33.3  | 70.0  | 123.3 | 0.4 | 56.7  | 191.0 | 143.3 | 0.3 |
| 2020.07.02            | 60.0  | 60.5  | 86.7  | 0.8 | 196.7 | 17.5  | 26.7  | 1.1 |
| 2020.08.14            | 106.7 | 77.5  | 63.3  | 0.0 | 220.0 | 81.5  | 23.3  | 0.0 |
| 2020.09.15            | 76.7  | 120.0 | 86.7  | 0.0 | 23.3  | 75.5  | 100.0 | 0.0 |
| 2020.10.21            | 40.0  | 82.0  | 73.3  | 0.0 | 46.7  | 115.0 | 66.7  | 0.0 |
| 2020.11.12            | 40.0  | 107.0 | 73.3  | 0.2 | 53.3  | 75.5  | 26.7  | 0.4 |
| 2020.12.17            | 56.7  | 108.0 | 63.3  | 0.2 | 56.7  | 280.0 | 256.7 | 0.2 |
| 2021.01.13            | 33.3  | 95.0  | 56.7  | 0.2 | 50.0  | 79.0  | 36.7  | 0.4 |
| 2021.02.23            | 56.7  | 73.5  | 70.0  | 0.2 | 86.7  | 73.5  | 60.0  | 0.1 |
| 2021.03.10/2021.03.11 | 46.7  | 77.0  | 73.3  | 0.1 | 60.0  | 143.0 | 16.7  | 0.2 |
